# Supplementary material
Source: PubMed Central journal article supplement (PMC5026968)

**Figure S1: Spleen histology of BALB/c mice infected with wild type and  $\Delta rpoE1$  *B. abortus* strains.** At 1 week post-infection spleens were harvested, and fixed before histology slides were prepared. Uninfected (naïve), WT-infected or  $\Delta rpoE1$ -infected mice spleens were H&E stained and *Brucella* antigen was visualized using immunohistochemistry with an anti-*Brucella* antibody. Scale bars are 100  $\mu$ m.

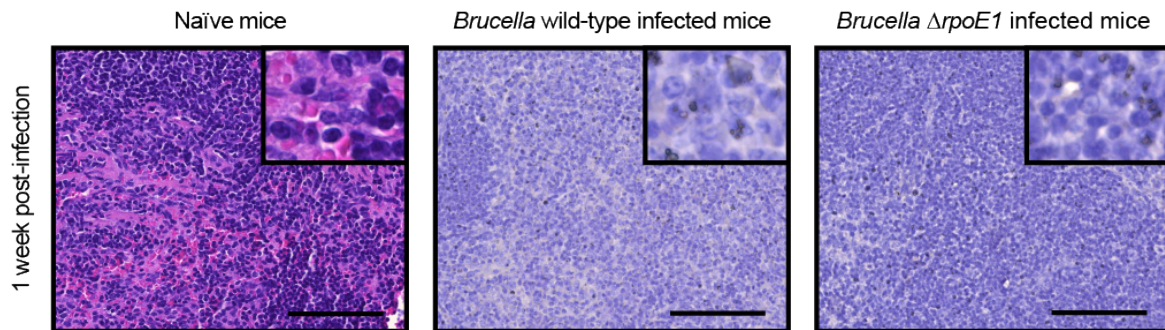

Supplement: NIHMS813454-supplement.pdf [file NIHMS813454-supplement.pdf]
